# Supplementary material
Source: PubMed Central journal article supplement (PMC4906241)
Supplement: mmc1.pdf [file mmc1.pdf]

**Biophysical Journal, Volume 110**

**Supplemental Information**

**Sequence Context Influences the Structure and Aggregation Behavior  
of a PolyQ Tract**

**Bahareh Eftekharzadeh, Alessandro Piai, Giulio Chiesa, Daniele Mungianu, Jesús García, Roberta Pierattelli, Isabella C. Felli, and Xavier Salvatella**

**Table S1** Experimental parameters used for the acquisition of the NMR experiments on 4Q for sequence-specific resonance assignment

|                                         | Spectral widths and maximal evolution times          |                                                       |                                        | No. of scans                | Inter-scan delays (s) | No. of complex points (aq) | No. of hypercomplex points | Duration of the experiment | Relative data points density (%) |       |
|-----------------------------------------|------------------------------------------------------|-------------------------------------------------------|----------------------------------------|-----------------------------|-----------------------|----------------------------|----------------------------|----------------------------|----------------------------------|-------|
|                                         | Indirect dimensions                                  |                                                       | Direct dimension                       |                             |                       |                            |                            |                            |                                  |       |
| 2D CON                                  |                                                      |                                                       | 2600 Hz ( <sup>15</sup> N)<br>197.0 ms | 8800 Hz ( <sup>13</sup> C') | 16                    | 2.5                        | 512                        | -                          | 12 hours, 30 min                 | 100   |
| 2D <sup>1</sup> H- <sup>15</sup> N HSQC |                                                      |                                                       | 1600 Hz ( <sup>15</sup> N)<br>160.0 ms | 10500 Hz ( <sup>1</sup> H)  | 8                     | 1.0                        | 1024                       | -                          | 1 hour, 20 min                   | 100   |
| 4D HCBCACON                             | 5000 Hz ( <sup>1</sup> H <sup>α/β</sup> )<br>20.0 ms | 12500 Hz ( <sup>13</sup> C <sup>α/β</sup> )<br>7.5 ms | 2600 Hz ( <sup>15</sup> N)<br>50.0 ms  | 8800 Hz ( <sup>13</sup> C') | 8                     | 0.9                        | 512                        | 850                        | 1 day, 10 hours                  | 0.07  |
| 4D HCBCANCO                             | 5000 Hz ( <sup>1</sup> H <sup>α/β</sup> )<br>20.0 ms | 12500 Hz ( <sup>13</sup> C <sup>α/β</sup> )<br>7.5 ms | 2600 Hz ( <sup>15</sup> N)<br>32.0 ms  | 8800 Hz ( <sup>13</sup> C') | 16                    | 0.9                        | 512                        | 850                        | 3 days, 2 hours                  | 0.11  |
| 4D (HCA)CON(CA)CON                      | 2200 Hz ( <sup>13</sup> C')                          | 2600 Hz ( <sup>15</sup> N)<br>24.2 ms                 | 2600 Hz ( <sup>15</sup> N)<br>30.0 ms  | 8800 Hz ( <sup>13</sup> C') | 16                    | 0.9                        | 512                        | 930                        | 3 days, 9 hours                  | 0.34  |
| 4D (HN)CON(CA)CON                       | 2200 Hz ( <sup>13</sup> C')                          | 2600 Hz ( <sup>15</sup> N)<br>24.2 ms                 | 2600 Hz ( <sup>15</sup> N)<br>30.0 ms  | 8800 Hz ( <sup>13</sup> C') | 32                    | 0.5                        | 512                        | 910                        | 4 days, 11 hours                 | 0.33  |
| 3D TROSY HNCO                           |                                                      | 2700 Hz ( <sup>13</sup> C')                           | 2300 Hz ( <sup>15</sup> N)<br>21.7 ms  | 14200 Hz ( <sup>1</sup> H)  | 8                     | 1.2                        | 1024                       | 560                        | 7 hours                          | 20.00 |
| 4D TROSY (H)NCO(CA)NNH                  | 2300 Hz ( <sup>15</sup> N)<br>20.4 ms                | 2700 Hz ( <sup>13</sup> C')                           | 2300 Hz ( <sup>15</sup> N)<br>23.9 ms  | 13300 Hz ( <sup>1</sup> H)  | 8                     | 1.2                        | 1024                       | 2660                       | 2 days, 20 hours                 | 1.60  |
| 4D TROSY HN(COCA)NNH                    | 1500 Hz ( <sup>1</sup> H)<br>20.0 ms                 | 2300 Hz ( <sup>15</sup> N)<br>23.9 ms                 | 2300 Hz ( <sup>15</sup> N)<br>23.9 ms  | 13300 Hz ( <sup>1</sup> H)  | 8                     | 1.2                        | 1024                       | 1450                       | 1 day, 13 hours                  | 1.60  |

**Table S2** Experimental parameters used for the acquisition of the NMR experiments on 25Q for sequence-specific resonance assignment

|                                         | Spectral widths and maximal evolution times          |                                                       |                                        | No. of scans                | Inter-scan delays (s) | No. of complex points (aq) | No. of hypercomplex points | Duration of the experiment | Relative data points density (%) |       |
|-----------------------------------------|------------------------------------------------------|-------------------------------------------------------|----------------------------------------|-----------------------------|-----------------------|----------------------------|----------------------------|----------------------------|----------------------------------|-------|
|                                         | Indirect dimensions                                  |                                                       | Direct dimension                       |                             |                       |                            |                            |                            |                                  |       |
| 2D CON                                  |                                                      |                                                       | 2600 Hz ( <sup>15</sup> N)<br>197.0 ms | 8800 Hz ( <sup>13</sup> C') | 16                    | 2.5                        | 512                        | -                          | 12 hours, 30 min                 | 100   |
| 2D <sup>1</sup> H- <sup>15</sup> N HSQC |                                                      |                                                       | 1600 Hz ( <sup>15</sup> N)<br>160.0 ms | 10500 Hz ( <sup>1</sup> H)  | 8                     | 1.0                        | 1024                       | -                          | 1 hour, 20 min                   | 100   |
| 4D HCBCACON                             | 5000 Hz ( <sup>1</sup> H <sup>α/β</sup> )<br>20.0 ms | 12500 Hz ( <sup>13</sup> C <sup>α/β</sup> )<br>7.5 ms | 2600 Hz ( <sup>15</sup> N)<br>50.0 ms  | 8800 Hz ( <sup>13</sup> C') | 8                     | 0.9                        | 512                        | 850                        | 1 day, 10 hours                  | 0.07  |
| 4D (HN)CON(CA)CON                       | 2200 Hz ( <sup>13</sup> C')                          | 2600 Hz ( <sup>15</sup> N)<br>24.2 ms                 | 2600 Hz ( <sup>15</sup> N)<br>30.0 ms  | 8800 Hz ( <sup>13</sup> C') | 32                    | 0.5                        | 512                        | 910                        | 4 days, 11 hours                 | 0.33  |
| 3D HNCO                                 |                                                      | 2000 Hz ( <sup>13</sup> C')                           | 2000 Hz ( <sup>15</sup> N)<br>24.0 ms  | 10500 Hz ( <sup>1</sup> H)  | 16                    | 1.0                        | 1024                       | 1130                       | 1 day                            | 33.30 |
| 3D TROSY HN(CA)CO                       |                                                      | 1800 Hz ( <sup>13</sup> C')                           | 2400 Hz ( <sup>15</sup> N)<br>20.8 ms  | 13300 Hz ( <sup>1</sup> H)  | 16                    | 1.2                        | 1024                       | 580                        | 14 hours                         | 26.00 |
| 4D TROSY HN(COCA)NNH                    | 1500 Hz ( <sup>1</sup> H)<br>20.0 ms                 | 2400 Hz ( <sup>15</sup> N)<br>22.9 ms                 | 2400 Hz ( <sup>15</sup> N)<br>22.9 ms  | 13300 Hz ( <sup>1</sup> H)  | 8                     | 1.2                        | 1024                       | 1720                       | 1 day, 20 hours                  | 1.90  |

**Table S3** Experimental parameters used for the acquisition of the  $^{15}\text{N}$  relaxation NMR experiments on 4Q

|                                                                                                                                                                                                                           | Spectral widths and maximal evolution times |                                      | No. of scans | Inter-scan delays (s) |
|---------------------------------------------------------------------------------------------------------------------------------------------------------------------------------------------------------------------------|---------------------------------------------|--------------------------------------|--------------|-----------------------|
| $^{15}\text{N}$ $R_1$                                                                                                                                                                                                     | 1600 Hz ( $^{15}\text{N}$ )<br>156.8 ms     | 10500 Hz ( $^1\text{H}$ )<br>97.6 ms | 8            | 3.0                   |
| $^{15}\text{N}$ $R_2$                                                                                                                                                                                                     | 1600 Hz ( $^{15}\text{N}$ )<br>156.8 ms     | 10500 Hz ( $^1\text{H}$ )<br>97.6 ms | 8            | 3.0                   |
| Steady-state heteronuclear $^{15}\text{N}\{^1\text{H}\}$ NOEs                                                                                                                                                             | 1600 Hz ( $^{15}\text{N}$ )<br>156.8 ms     | 10500 Hz ( $^1\text{H}$ )<br>97.6 ms | 64           | 6.0                   |
| For the determination of $R_1$ , 10 experiments were acquired changing the variable delay from 15 to 995 ms. For the determination of $R_2$ , 10 experiments were acquired changing the variable delay from 30 to 565 ms. |                                             |                                      |              |                       |

**Table S4** Experimental parameters used for the acquisition of the  $^{15}\text{N}$  relaxation NMR experiments on 25Q

|                                                                                                                                                                                                                           | Spectral widths and maximal evolution times |                                      | No. of scans | Inter-scan delays (s) |
|---------------------------------------------------------------------------------------------------------------------------------------------------------------------------------------------------------------------------|---------------------------------------------|--------------------------------------|--------------|-----------------------|
| $^{15}\text{N}$ $R_1$                                                                                                                                                                                                     | 1600 Hz ( $^{15}\text{N}$ )<br>156.8 ms     | 10500 Hz ( $^1\text{H}$ )<br>97.6 ms | 8            | 3.0                   |
| $^{15}\text{N}$ $R_2$                                                                                                                                                                                                     | 1600 Hz ( $^{15}\text{N}$ )<br>156.8 ms     | 10500 Hz ( $^1\text{H}$ )<br>97.6 ms | 8            | 3.0                   |
| Steady-state heteronuclear $^{15}\text{N}\{^1\text{H}\}$ NOEs                                                                                                                                                             | 1600 Hz ( $^{15}\text{N}$ )<br>177.7 ms     | 10500 Hz ( $^1\text{H}$ )<br>97.6 ms | 64           | 6.0                   |
| For the determination of $R_1$ , 10 experiments were acquired changing the variable delay from 15 to 995 ms. For the determination of $R_2$ , 10 experiments were acquired changing the variable delay from 30 to 315 ms. |                                             |                                      |              |                       |

## Supporting Figures

**4Q:**

GMEVQLGLGRVYPRPPSKTYRGAFFQNLFQSVREVIQNPGRHPEAASAAPP GAS **L L L L Q Q Q Q** E T S P  
R Q Q Q Q Q Q Q G E D G S P Q A H R R G P T G Y L V L D E E Q Q P S Q P Q S A L E C H P E R G C V P E P G A A V A A S K G L P Q Q L P  
A P P

**25Q:**

GMEVQLGLGRVYPRPPSKTYRGAFFQNLFQSVREVIQNPGRHPEAASAAPP GAS **L L L L Q Q Q Q Q Q Q Q**  
**Q Q Q Q Q Q Q Q Q Q Q Q Q Q Q Q Q Q** E T S P R Q Q Q Q Q Q Q G E D G S P Q A H R R G P T G Y L V L D E E Q Q P S Q P Q S A L E C H P E R  
G C V P E P G A A V A A S K G L P Q Q L P A P P

**25Q $\Delta$ L4:**

GMEVQLGLGRVYPRPPSKTYRGAFFQNLFQSVREVIQNPGRHPEAASAAPP GAS **Q Q Q Q Q Q Q Q Q Q Q Q**  
**Q Q Q Q Q Q Q Q Q Q Q Q Q Q** E T S P R Q Q Q Q Q Q Q G E D G S P Q A H R R G P T G Y L V L D E E Q Q P S Q P Q S A L E C H P E R G C V P  
E P G A A V A A S K G L P Q Q L P A P P

**Figure S1** Sequences of the constructs used in this work. The polyQ tracts are shown in purple, as in Figure 1 of the main text, and the Leu<sub>4</sub> motif is shown in green.

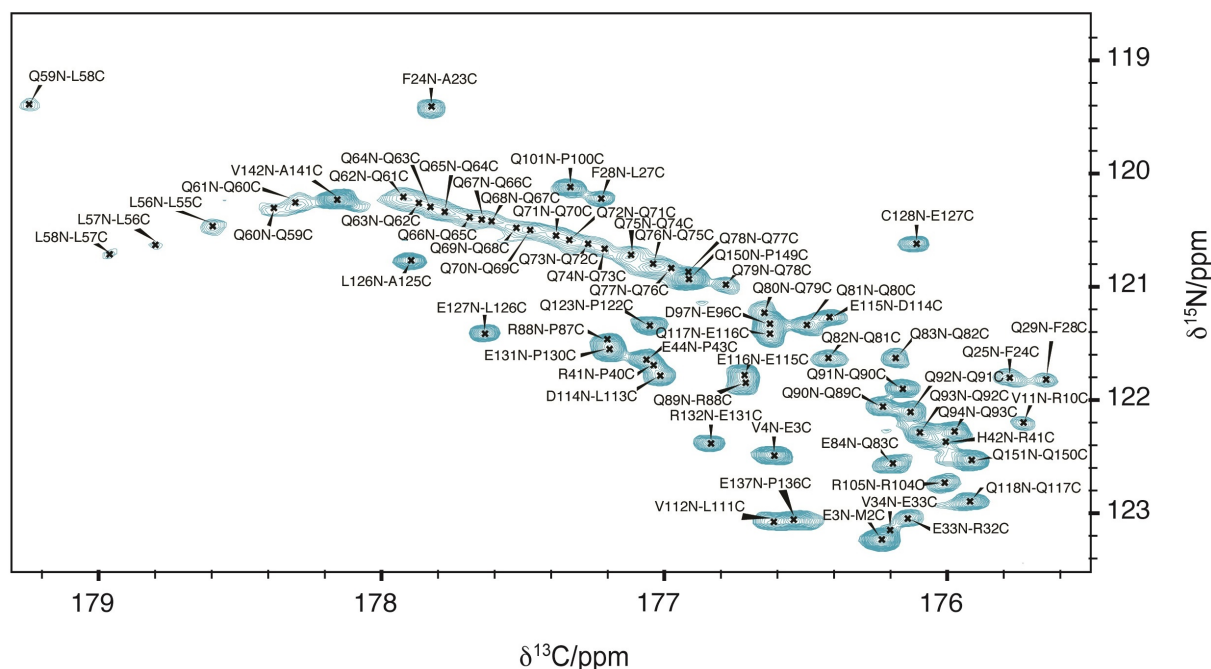

**Figure S2** Close up view of the CON-IPAP spectrum of 25Q with the full assignment of the polyQ tract.  $^{13}\text{C}$  dimension increases the chemical shift dispersion of the resonances and reduces cross-peak overlaps in the polyQ region.

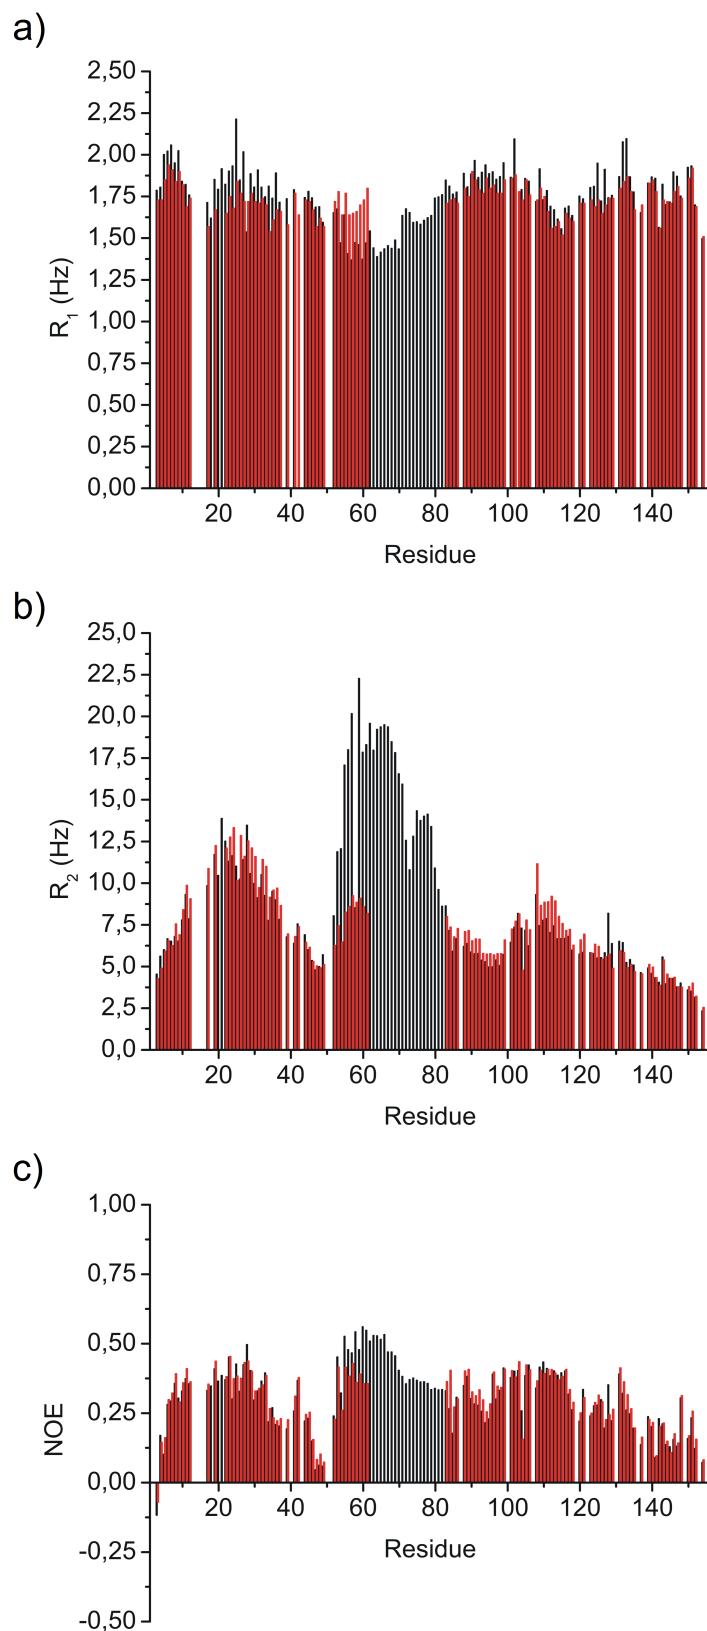

**Figure S3**  $^{15}\text{N}$  relaxation rates of 4Q (red) and 25Q (black).  $^{15}\text{N}$   $R_1$ ,  $^{15}\text{N}$   $R_2$  relaxation rates and  $\{^1\text{H}\}$ - $^{15}\text{N}$  NOEs are reported as a function of residue number. To facilitate the comparison, error bars have been removed and values for residues of 4Q which are C-terminal to the polyQ tract have been shifted to the right by 21 units.
